# Supplementary material
Source: PubMed Central journal article supplement (PMC10642451)
Supplement: NIHMS1726953-supplement-Supplementary_Information.pdf [file NIHMS1726953-supplement-Supplementary_Information.pdf]

## Free energy landscapes from SARS-CoV-2 spike glycoprotein simulations suggest that RBD opening can be modulated via interactions in an allosteric pocket

Lucy Fallon<sup>1,2#</sup>, Kellon A.A. Belfon<sup>1,2#</sup>, Lauren Raguette<sup>1,2</sup>, Yuzhang Wang<sup>1,2</sup>, Darya Stepanenko<sup>1,4</sup>, Abbigayle Cuomo<sup>2</sup>, Jose Guerra<sup>5</sup>, Stephanie Budhan<sup>2</sup>, Sarah Varghese<sup>6</sup>, Christopher Corbo<sup>3</sup>, Robert C. Rizzo<sup>1,4</sup>, and Carlos Simmerling<sup>1,2\*</sup>

<sup>1</sup>Laufer Center for Physical and Quantitative Biology, Stony Brook University, Stony Brook, New York 11794, United States

<sup>2</sup>Department of Chemistry, Stony Brook University, Stony Brook, New York 11794, United States

<sup>3</sup>Graduate Program in Molecular and Cellular Pharmacology, Stony Brook University, Stony Brook, New York 11794, United States

<sup>4</sup>Department of Applied Mathematics and Statistics, Stony Brook University, Stony Brook, New York 11794, United States

<sup>5</sup>Department of Biochemistry and Cell Biology, Stony Brook University, Stony Brook, New York 11794, United States

<sup>6</sup>Undergraduate Program in Biology, Stony Brook University, Stony Brook, New York 11794, United States

# These authors contributed equally to this work.

### Organization

1. Figures
2. Tables
3. References

---

### 1. Figures

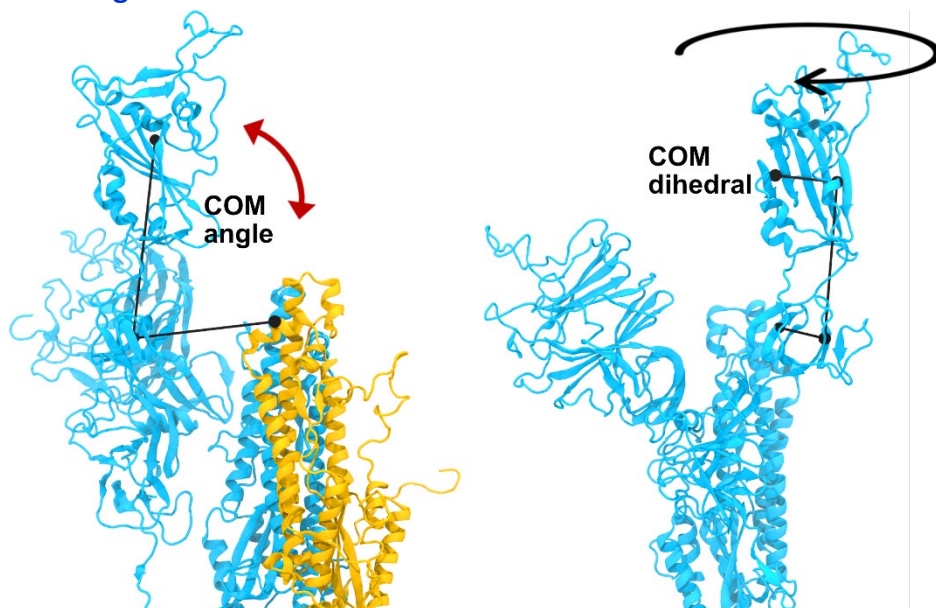

**Figure S1**– Center of mass (COM) based collective variables (CVs) used to quantify RBD motion relative to the remainder of the spike. (Left) the COM angle measures movement of the RBD up and away from the core central helices, and (right) the COM dihedral measures rotation of the RBD relative to the CTD1 domain. Portions of 2 protomers are shown, with coloring matching **Figure 4**. Amino acid ranges used to define the COM groups (black circles) are shown in **Table S4**. Additional details are provided in Methods.

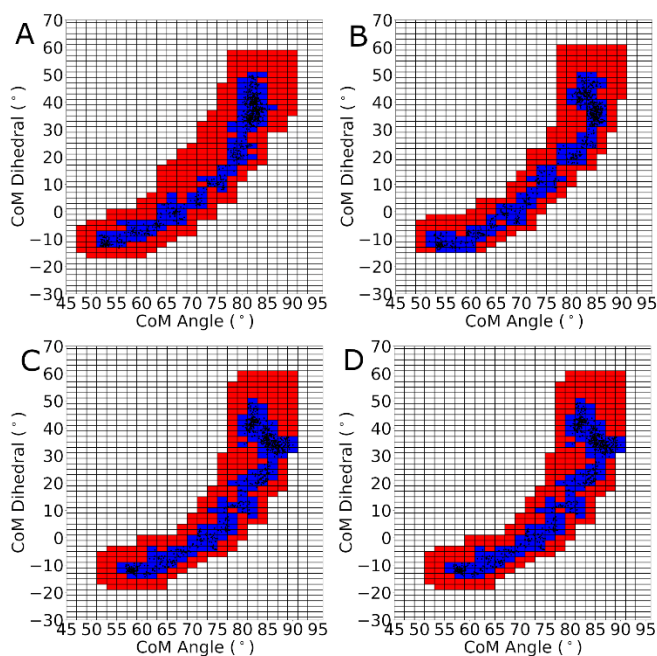

**Figure S2:** 2D grid of CoM angle and CoM dihedral collective variables. The colored grids were used as windows for US simulations to calculate the free energy for RBD opening in A) WT, B) K528A, C) A522L, and D) A522V S-protein. The initial grids used as US windows before grid expansion are shown in blue, additional grids used as new windows for expansion are shown in red. The SMD trajectory snapshots are mapped onto the 2D grid as black dots.

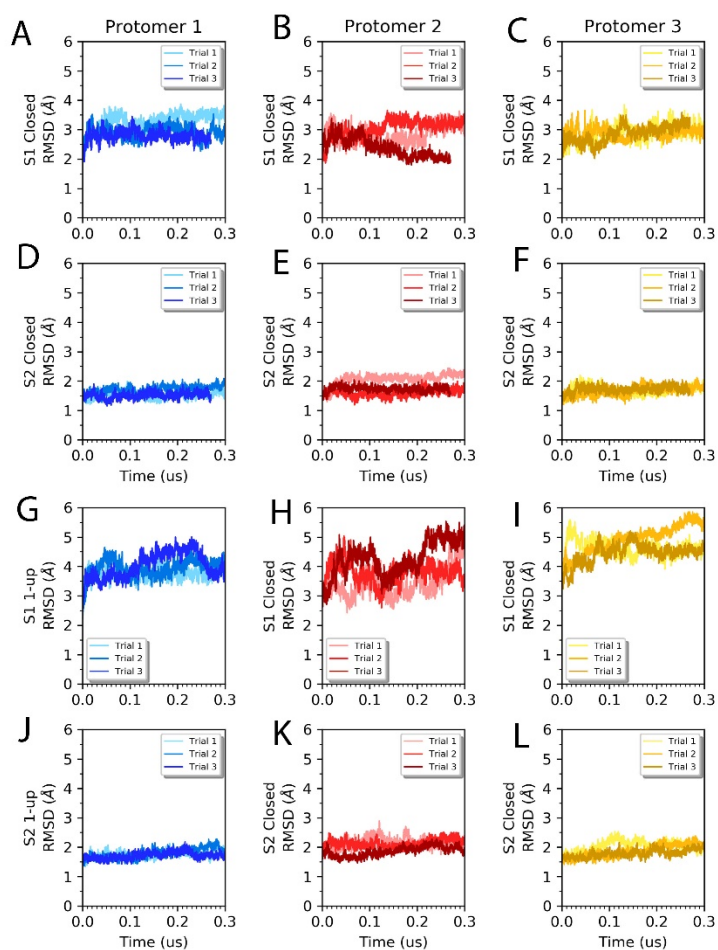

**Figure S3.** RMSD of backbone atoms of each protomer (blue, red, yellow) over three MD runs of the spike over 270, 300 and 300 ns. (A,B,C) S1, closed spike system; (D,E,F) S2, closed; (G,H,I) S1, 1-up; (J,K,L) S2, 1-up. Each shade in a plot represents one of three independent trials. Columns represent protomers 1, 2 and 3 with colors matching **Figure 4**. RMSD is relative to the respective reference structure.

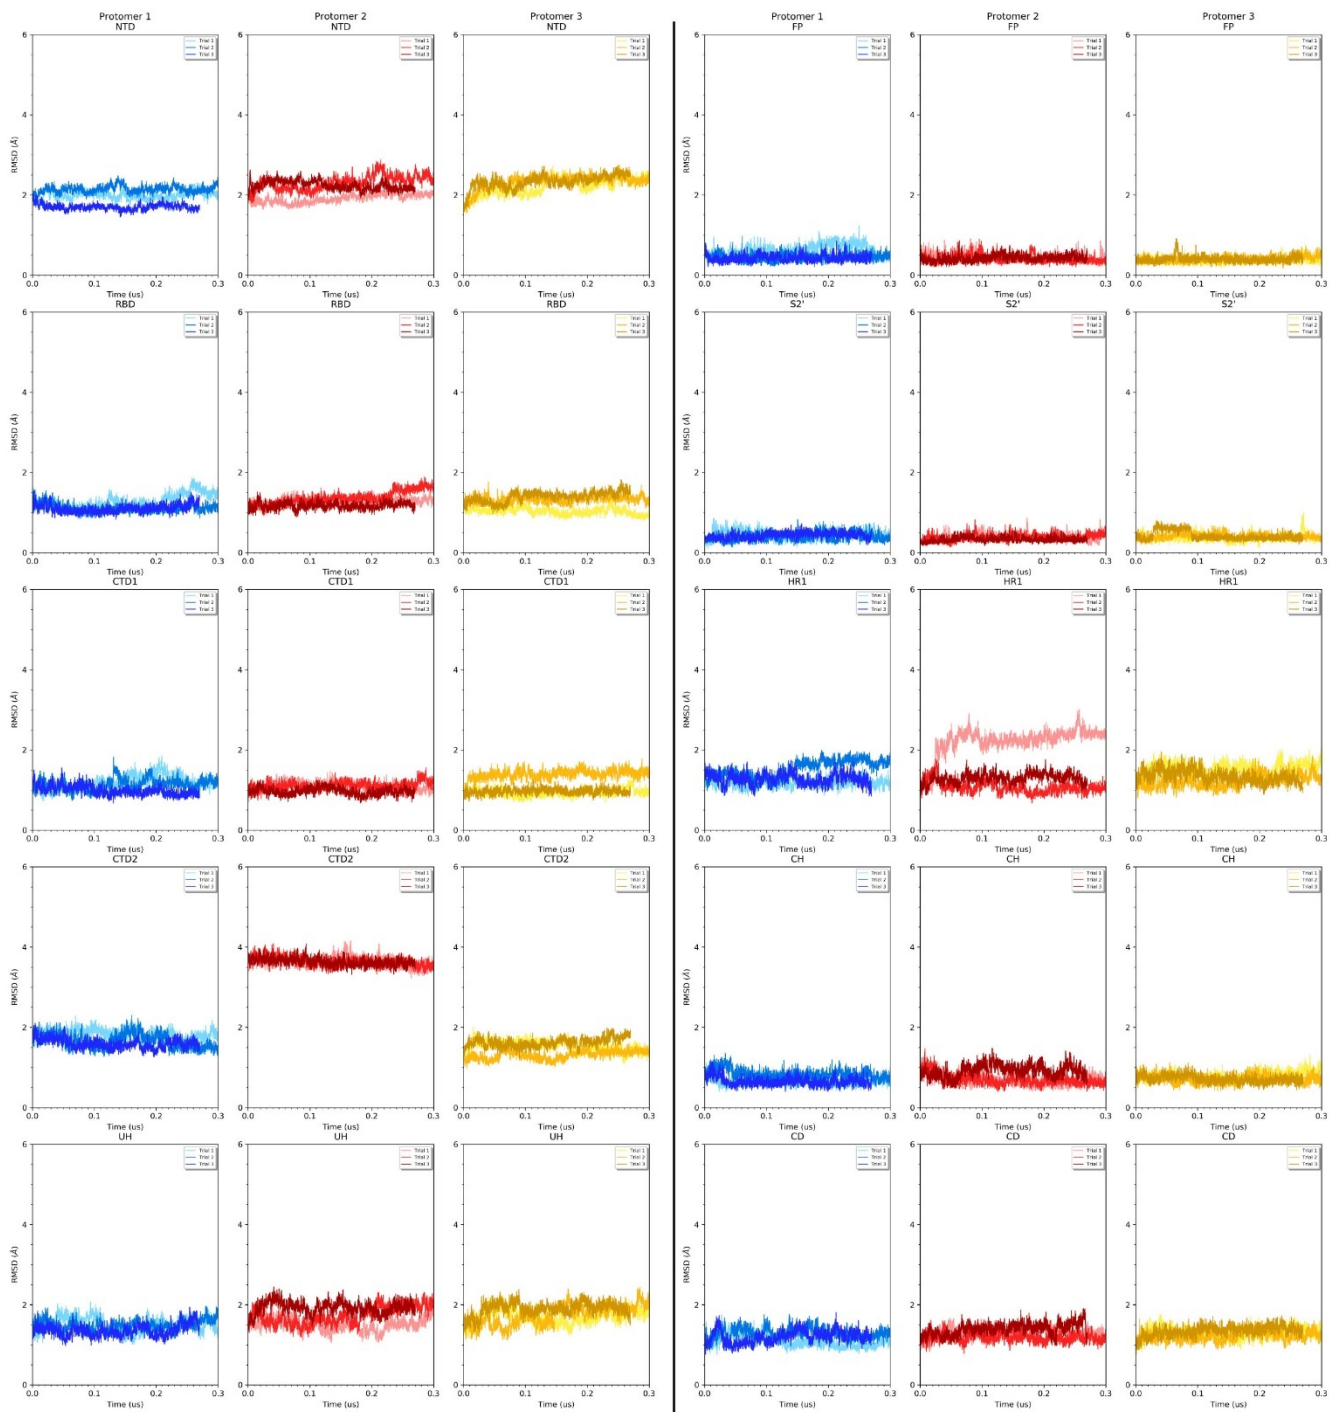

**Figure S4.** Domain RMSDs during MD simulations of the closed spike. Residue ranges for each domain are provided in Table S3. Rows correspond to specific domains. Columns show data for each protomer, with 3 independent runs in different shades. RMSD is relative to the respective reference structure.

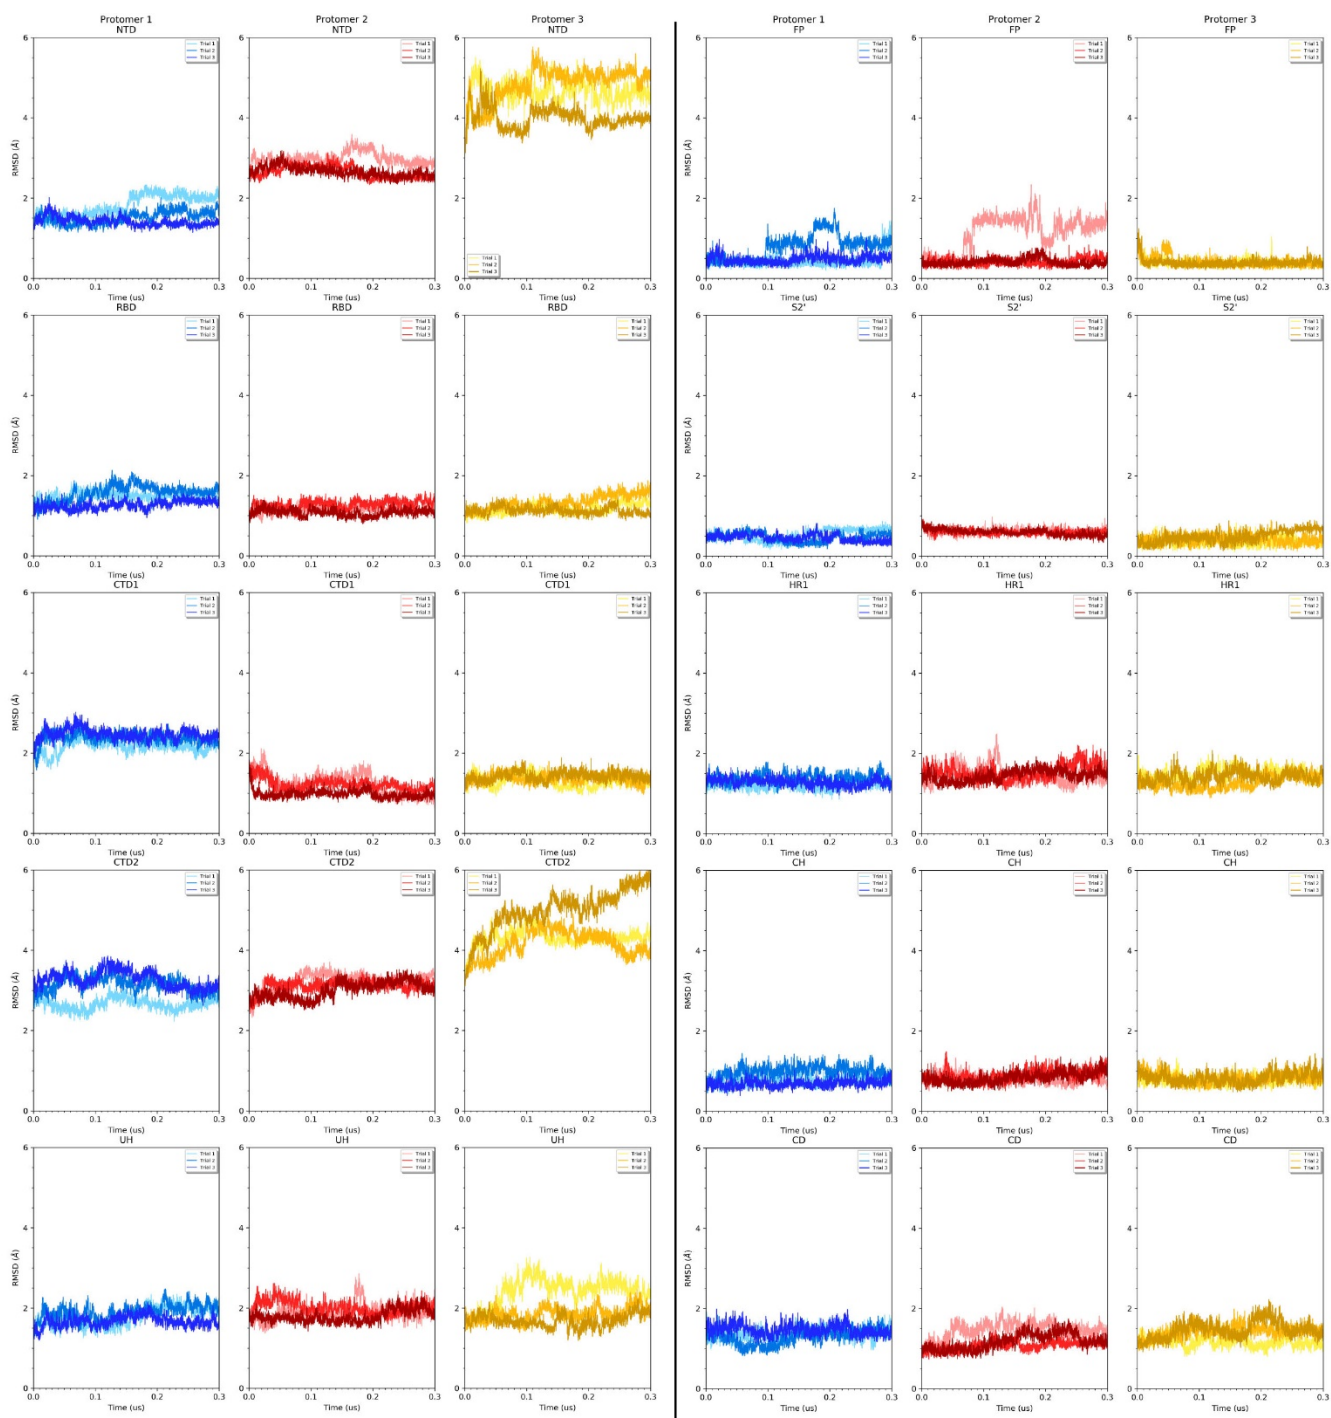

**Figure S5.** Domain RMSDs during MD simulations of the 1-up spike. Residue ranges for each domain are provided in Table S3. Columns show data for each protomer, with 3 independent runs in different shades. Protomer 1 has the RBD in the open position. RMSD is relative to the respective reference structure.

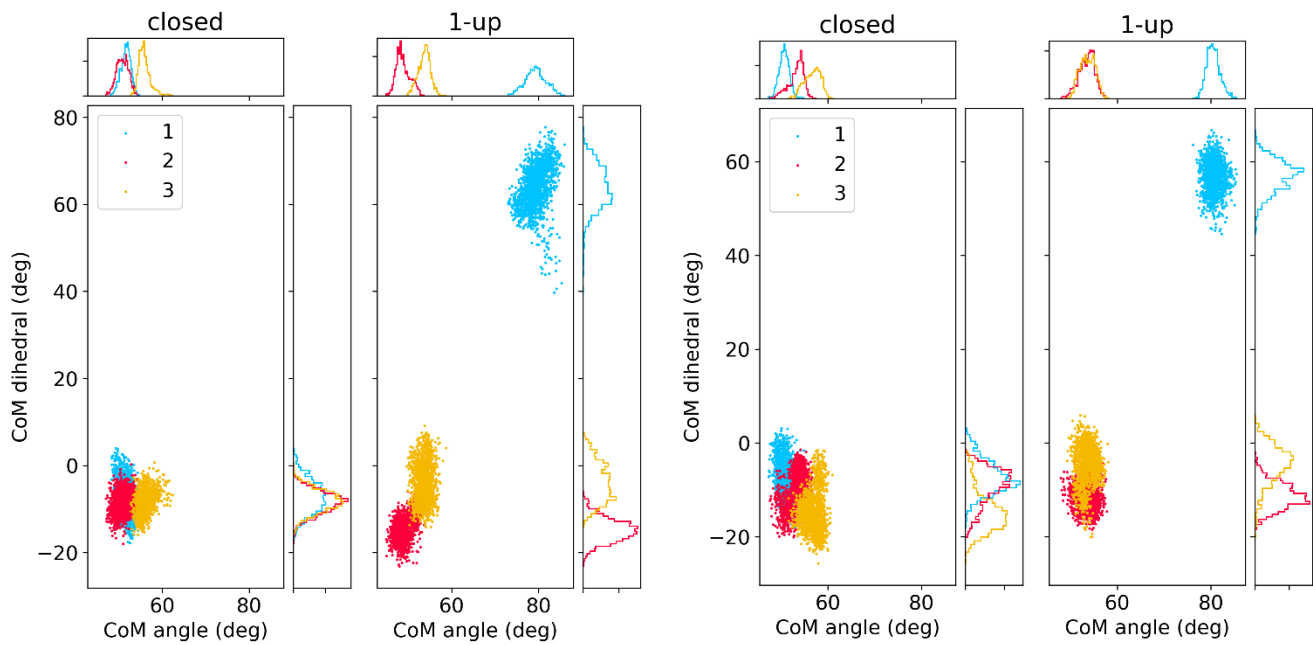

**Figure S6.** Collective variables for 2 additional independent runs of closed and 1-up spike. Simulation times: 300 ns (left), 270 ns (right).

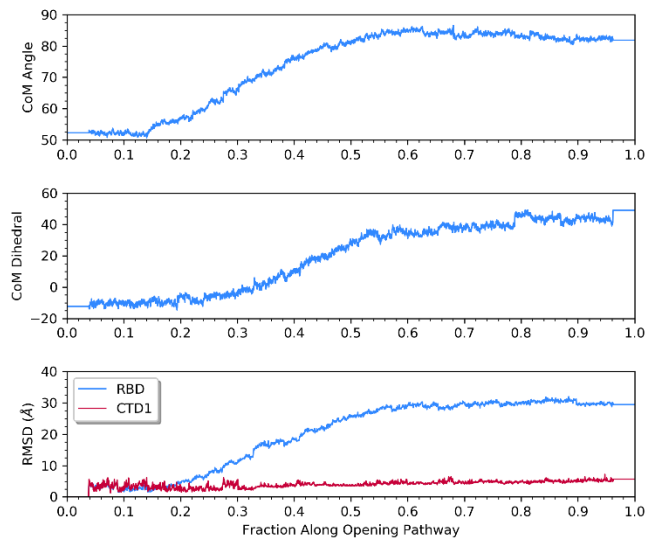

**Figure S7.** Spike structure properties during the RBD opening pathway, with the closed state on the left and the 1-up spike on the right. (Top) RBD opening angle, (middle) RBD rotation dihedral, (bottom) RMSD values for RBD and CTD1 domains, after best-fit to central helices (CH).



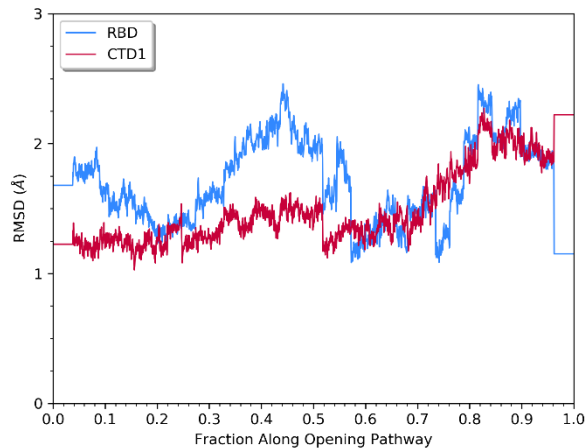

**Figure S8.** RMSD of RBD and CTD1 domains as a function of opening pathway, with each domain best-fit to the same atoms in the open reference model, using the residues listed in **Table S3**.

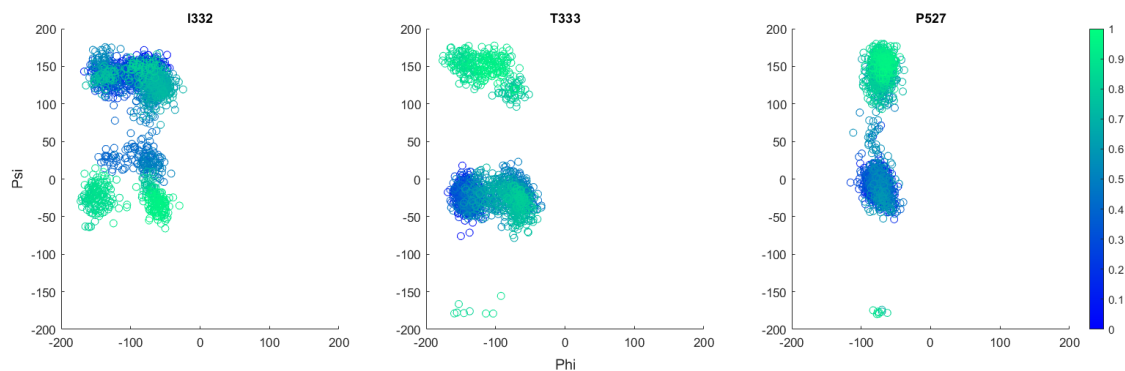

**Figure S9.** Selected backbone dihedrals in the RBD-CTD1 connector strands as a function of RBD opening pathway. Snapshots are shown as circles, with the opening progress indicated by the color range.

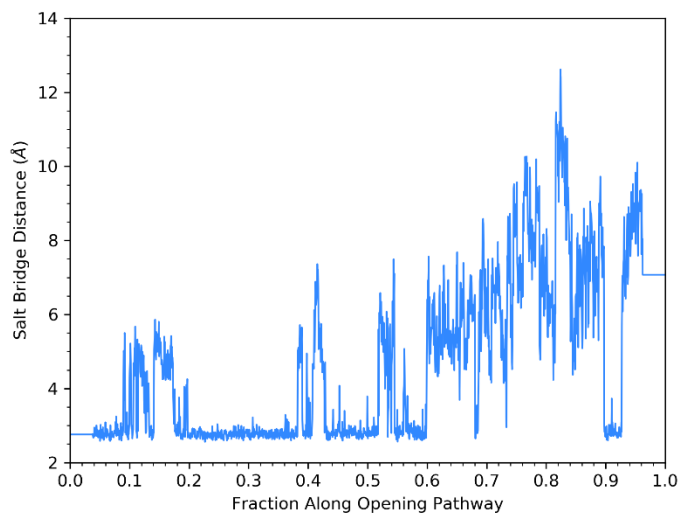

**Figure S10.** Distance between sidechains of K528 (N $\zeta$ ) and D389 (C $\delta$ ) as a function of RBD opening pathway.

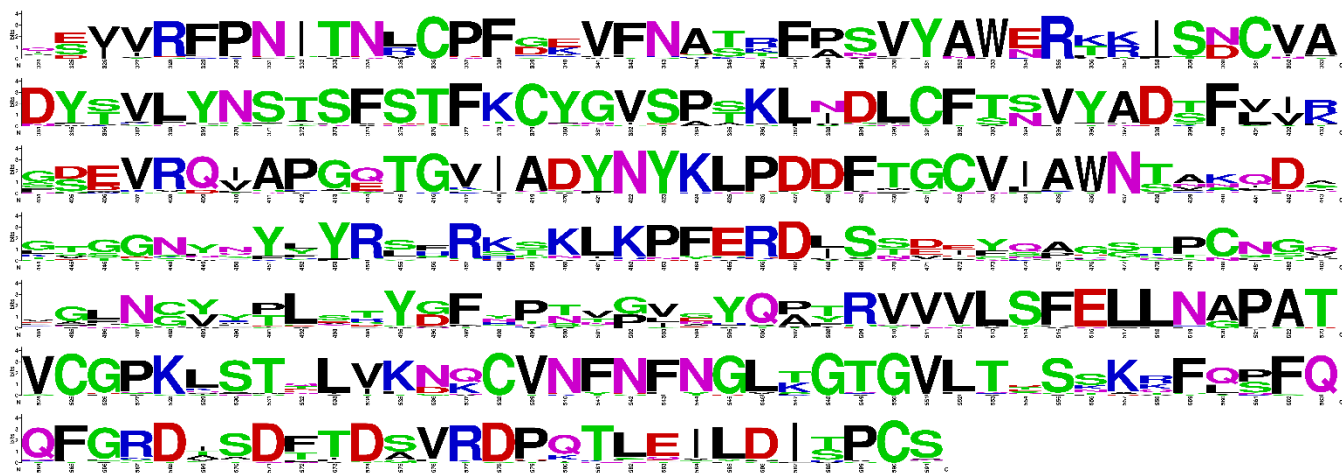

**Figure S11.** Sequence conservation for amino acids in the hinge pocket region (including positions 324-591), across 21 different coronaviruses.

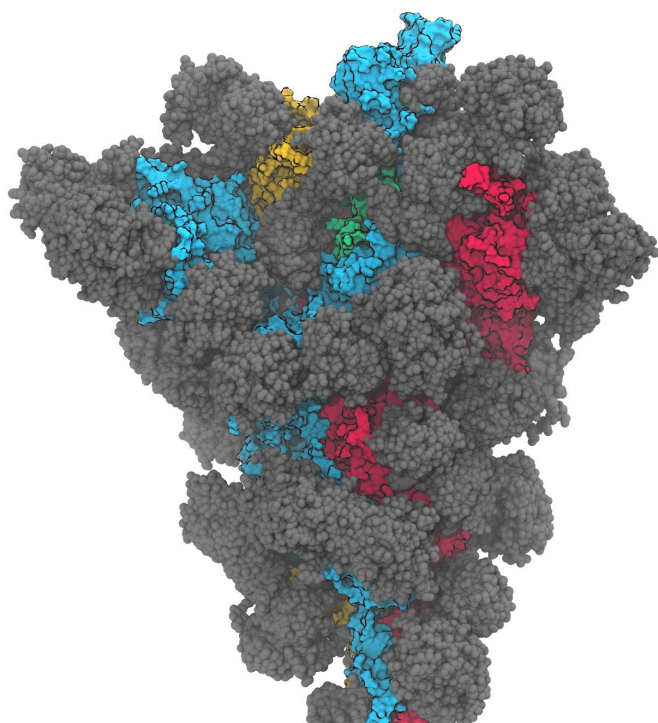

**Figure S12.** Spike structure in MD simulations, comparable to **Figure 3**. The gray glycans effectively shield the exterior of the conserved hinge region (highlighted in green).



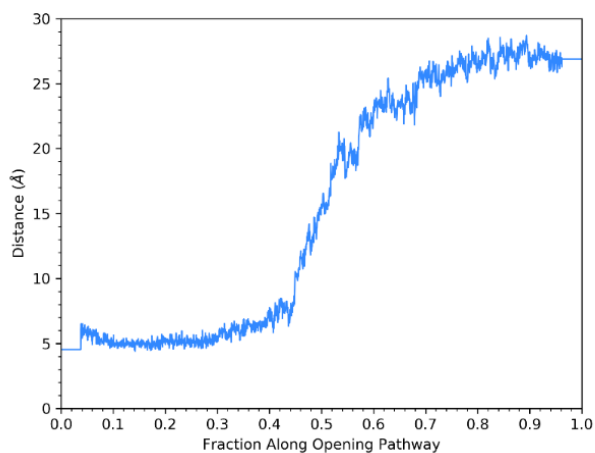

**Figure S13.** Distance between Cα atoms of A520 in RBD and Q564 in CTD1 as a function of RBD opening pathway for full spike;

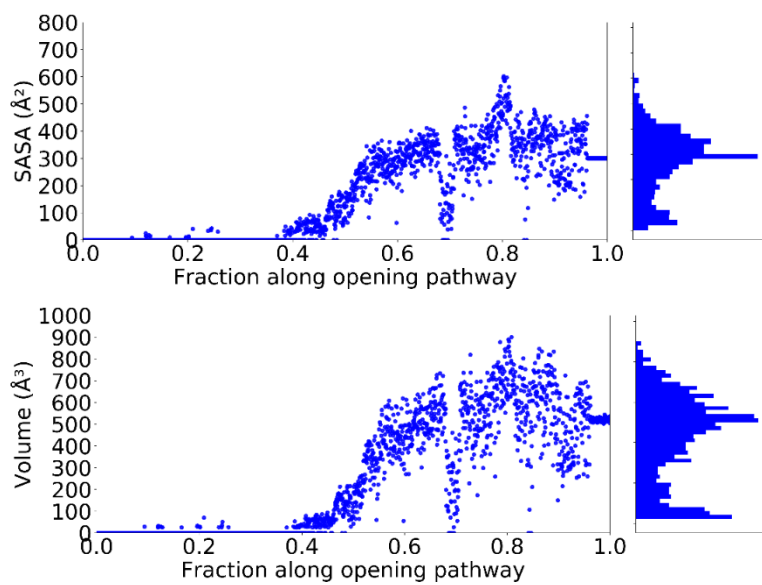

**Figure S14:** The change in hinge pocket volume and SASA as a function of RBD opening pathway. Data were calculated from the NEB snapshots using fpocket.<sup>1</sup>

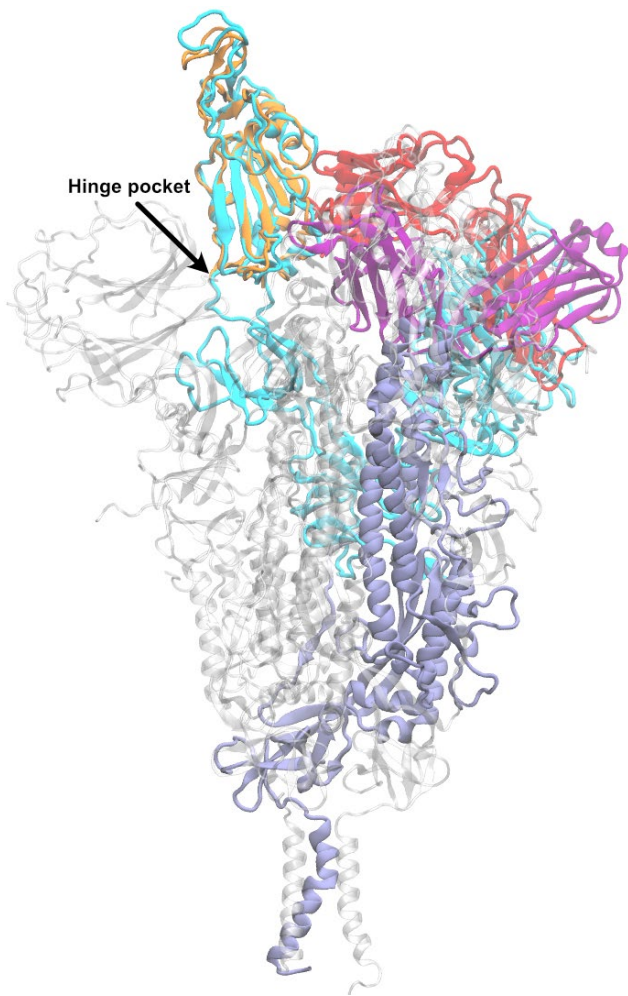

**Figure S15.** Spike protein from 1-up MD (1 protomer shown with S1 in cyan and S2 in gray, other protomers transparent), with hinge pocket indicated in relation to location of binding of cryptic antibody CR3022 from crystal structure 6W41<sup>2</sup> (RBD in orange, antibody in red/purple). The crystal structure contained only the RBD, not the entire spike. The RBD domains of the 2 systems were best-fit.

---

## 2. Tables

**Table S1.** Structures and types of glycans on each chain.<sup>3</sup>

| Type           | Chain A                      | Chain B                            | Chain C                                    | Sequence                                                                                                                                            |
|----------------|------------------------------|------------------------------------|--------------------------------------------|-----------------------------------------------------------------------------------------------------------------------------------------------------|
| <b>M5</b>      | N61, N122, N657              | N61, N165, N603, N709, N717, N1074 | N61, N122, N603                            | aDMan(1→6)[aDMan(1→3)]aDMan(1→6)<br>[aDMan(1→3)]bDMan(1→4)bDGlcNAc(1→4)bDGlcNAc(1→)                                                                 |
| <b>M6</b>      | N709, N801                   |                                    | N717                                       | aDMan(1→6)[aDMan(1→3)]aDMan(1→6)<br>[aDMan(1→2)aDMan(1→3)]bDMan(1→4)bDGlcNAc(1→4)bDGlcNAc(1→)                                                       |
| <b>M7</b>      |                              | N801                               |                                            | aDMan(1→2)aDMan(1→2)aDMan(1→3)[aDMan(1→6)<br>[aDMan(1→3)]aDMan(1→6)]bDMan(1→4)bDGlcNAc(1→4)bDGlcNAc(1→)                                             |
| <b>M8</b>      | N234                         |                                    |                                            | aDMan(1→2)aDMan(1→6)[aDMan(1→3)]aDMan(1→6)<br>[aDMan(1→2)aDMan(1→2)aDMan(1→3)]bDMan(1→4)bDGlcNAc(1→4)bDGlcNAc(1→)                                   |
| <b>M9</b>      |                              | N234                               | N234                                       | aDMan(1→2)aDMan(1→6)[aDMan(1→2)aDMan(1→3)]aDMan(1→6)<br>[aDMan(1→2)aDMan(1→2)aDMan(1→3)]bDMan(1→4)bDGlcNAc(1→4)bDGlcNAc(1→)                         |
| <b>A2</b>      | N616, N1158                  | N1098                              | N74, N282, N1158                           | bDGlcNAc(1→2)aDMan(1→6)<br>[bDGlcNAc(1→2)aDMan(1→3)]bDMan(1→4)bDGlcNAc(1→4)bDGlcNAc(1→)                                                             |
| <b>A3</b>      | N74                          |                                    |                                            | bDGlcNAc(1→6)[bDGlcNAc(1→2)]aDMan(1→6)<br>[bDGlcNAc(1→2)aDMan(1→3)]bDMan(1→4)bDGlcNAc(1→4)bDGlcNAc(1→)                                              |
| <b>FA1</b>     | N1134                        | N343                               |                                            | bDGlcNAc(1→2)aDMan(1→3)[aDMan(1→6)]bDMan(1→4)bDGlcNAc(1→4) [aLFuc(1→6)]bDGlcNAc(1→)                                                                 |
| <b>FA2</b>     | N17, N331, N343, N603, N1098 | N122, N331, N616                   | N149, N343, N616, N709, N801, N1074, N1134 | bDGlcNAc(1→2)aDMan(1→6)[bDGlcNAc(1→2)aDMan(1→3)]bDMan(1→4)bDGlcNAc(1→4)[aLFuc(1→6)]bDGlcNAc(1→)                                                     |
| <b>FA2G2S1</b> | N149, N1074                  | N1158                              | N165                                       | aDNeu5Ac(2→6)bDGal(1→4)bDGlcNAc(1→2)aDMan(1→6)<br>[bDGal(1→4)bDGlcNAc(1→2)aDMan(1→3)]bDMan(1→4)bDGlcNAc(1→4) [aLFuc(1→6)]bDGlcNAc(1→)               |
| <b>FA2G2S2</b> | N165                         |                                    |                                            | xaDNeu5Ac(2→6)bDGal(1→4)bDGlcNAc(1→2)aDMan(1→6)<br>[aDNeu5Ac(2→6)bDGal(1→4)bDGlcNAc(1→2)aDMan(1→3)]bDMan(1→4)bDGlcNAc(1→4) [aLFuc(1→6)]bDGlcNAc(1→) |
| <b>FA3</b>     | N282                         | N17, N149, N1134                   | N17                                        | bDGlcNAc(1→6)[bDGlcNAc(1→2)]aDMan(1→6)<br>[bDGlcNAc(1→2)aDMan(1→3)]bDMan(1→4)bDGlcNAc(1→4)[aLFuc(1→6)]bDGlcNAc(1→)                                  |

|                    |            |       |       |                                                                                                                                                                                          |
|--------------------|------------|-------|-------|------------------------------------------------------------------------------------------------------------------------------------------------------------------------------------------|
| <b>FA3G3S1</b>     |            | N282  | N331  | aDNeu5Ac(2→6)bDGal(1→4)bDGlcNAc(1→2)aDMan(1→3)[bDGal(1→4)bDGlcNAc(1→6)<br>[bDGal(1→4)bDGlcNAc(1→2)]aDMan(1→6)]bDMan(1→4)bDGlcNAc(1→4) [aLFuc(1→6)]bDGlcNAc(1→)                           |
| <b>FA3G3S2</b>     |            | N74   |       | aDNeu5Ac(2→6)bDGal(1→4)bDGlcNAc(1→6)[bDGal(1→4)bDGlcNAc(1→2)]aDMan(1→6)<br>[aDNeu5Ac(2→6)bDGal(1→4)bDGlcNAc(1→2)aDMan(1→3)]bDMan(1→4)bDGlcNAc(1→4) [aLFuc(1→6)]bDGlcNAc(1→)              |
| <b>FA4</b>         | N1173      | N1173 | N1173 | bDGlcNAc(1→6)[bDGlcNAc(1→2)]aDMan(1→6)[bDGlcNAc(1→4)<br>[bDGlcNAc(1→2)]aDMan(1→3)]bDMan(1→4)bDGlcNAc(1→4)[aLFuc(1→6)]bDGlcNAc(1→)                                                        |
| <b>FA4G4S1</b>     | N1194      | N1194 | N1194 | aDNeu5Ac(2→6)bDGal(1→4)bDGlcNAc(1→6)[bDGal(1→4)bDGlcNAc(1→2)]aDMan(1→6) [bDGal(1→4)bDGlcNAc(1→4)<br>[bDGal(1→4)bDGlcNAc(1→2)]aDMan(1→3)]bDMan(1→4)bDGlcNAc(1→4) [aLFuc(1→6)]bDGlcNAc(1→) |
| <b>Hybrid G1</b>   | N717       | N657  | N657  | bDGal(1→4)bDGlcNAc(1→2)aDMan(1→3)[aDMan(1→6)<br>[aDMan(1→3)]aDMan(1→6)]bDMan(1→4)bDGlcNAc(1→4)bDGlcNAc(1→)                                                                               |
| <b>Hybrid G1S1</b> |            |       | N1098 | aDNeu5Ac(2→6)bDGal(1→4)bDGlcNAc(1→2)aDMan(1→3)[aDMan(1→6)<br>[aDMan(1→3)]aDMan(1→6)]bDMan(1→4)bDGlcNAc(1→4)bDGlcNAc(1→)                                                                  |
| <b>O1</b>          |            |       | T323  | bDGal(1→3)aDGalNAc(1→)                                                                                                                                                                   |
| <b>O2</b>          | T323, S325 |       |       | aDNeu5Ac(2→3)bDGal(1→3)aDGalNAc(1→)                                                                                                                                                      |
| <b>O3</b>          |            | T323  |       | aDNeu5Ac(2→3)bDGal(1→3)[aDNeu5Ac(2→6)]aDGalNAc(1→)                                                                                                                                       |

**Table S2.** Disulfide bonds in the “amended models”. Rows in bold indicate the five disulfide bonds in the RBD and CTD1 domains, also included in the RBD+CTD1 construct.

|                    |
|--------------------|
| <b>SARS-CoV-2</b>  |
| C131 - C166        |
| C291 - C301        |
| <b>C336 - C361</b> |
| <b>C379 - C432</b> |
| <b>C391 - C525</b> |
| <b>C480 - C488</b> |
| <b>C538 - C590</b> |
| C617 - C649        |
| C662 - C671        |
| C730 - C768        |
| C743 - C749        |
| C1032 - C1043      |
| C1082 - C1126      |

**Table S3.** Reside ranges used for RMSD calculations

| Subunit | Domain/<br>Region of interest | Residues in domain | Residues for RMSD                                          |
|---------|-------------------------------|--------------------|------------------------------------------------------------|
| S1      | NTD                           | 16-285             | 27-66, 81-140, 164-172, 186-196, 200-211, 215-242, 263-285 |
|         | RBD                           | 335-530            | 335-454, 462-466, 491-515, 522-530                         |
|         | CTD1                          | 315-334, 531-591   | 315-334, 531-591                                           |
|         | CTD2                          | 592-685            | 592-620, 641-676                                           |
| S2      | UH                            | 686-813            | 691-811, 813                                               |
|         | S2' (KRSF)                    | 814-817            | 814-817                                                    |
|         | FP                            | 818-825            | 818-825                                                    |
|         | HR1                           | 867-984            | 867-984                                                    |
|         | CH                            | 985-1036           | 985-1036                                                   |
|         | CD                            | 1037-1137          | 1037-1137                                                  |

**Table S4.** Amino acids used to define center-of-mass collective variables for the RBD closed-open transition. The group is defined by the center of mass of all C $\alpha$  atoms of all amino acids in the range.

| CoM groups | 1                                     | 2                       | 3                       | 4                       |
|------------|---------------------------------------|-------------------------|-------------------------|-------------------------|
| Angle      | F338-L517                             | E324-V327,<br>C538-L585 | T747*-Q755*             |                         |
| Dihedral   | E324-V327,<br>C538-F543,<br>L546-T549 | A575-D578,<br>L582-D586 | N354-I358,<br>T396-S399 | S375-C379,<br>C432-W436 |

Asterisks indicates the neighboring protomer on the clockwise side when viewing the spike from the S1 side (top side)

**Table S5.** List of sequences used to calculate conservation scores. We gratefully acknowledge the following Authors from the Originating laboratories responsible for obtaining the specimens and the Submitting laboratories where genetic sequence data were generated and shared via the GISAID Initiative, on which this research is based. All submitters of data may be contacted directly via [www.gisaid.org](http://www.gisaid.org)<sup>4</sup>

| Accession ID   | Virus Name                            | Location                     | Date Collected | Host                | Originating Lab          | Submitting Lab                                           | Authors                                                                              |
|----------------|---------------------------------------|------------------------------|----------------|---------------------|--------------------------|----------------------------------------------------------|--------------------------------------------------------------------------------------|
| EPI_ISL_402124 | hCoV-19/Wuhan/WIV04/2019 (SARS-CoV-2) | Asia / China / Hubei / Wuhan | 2019-12-30     | <i>Homo sapiens</i> | Wuhan Jinyintan Hospital | Wuhan Institute of Virology, Chinese Academy of Sciences | Peng Zhou, Xing-Lou Yang, Ding-Yu Zhang, Lei Zhang, Yan Zhu, Hao-Rui Si, Zhengli Shi |

|                    |                                                      |                          |      |                     |                                                    |                                                    |                                                                                                                                                             |
|--------------------|------------------------------------------------------|--------------------------|------|---------------------|----------------------------------------------------|----------------------------------------------------|-------------------------------------------------------------------------------------------------------------------------------------------------------------|
| EPI_ISL_410539     | hCoV-19/pangolin/Guangxi/P1E/2017                    | Asia / China / Guangxi   | 2017 | Manis javanica      | Beijing Institute of Microbiology and Epidemiology | Beijing Institute of Microbiology and Epidemiology | Wu-Chun Cao; Tommy Tsan-Yuk Lam; Na Jia; Ya-Wei Zhang; Jia-Fu Jiang; Bao-Gui Jiang                                                                          |
| EPI_ISL_410541     | hCoV-19/pangolin/Guangxi/P5E/2017                    | Asia / China / Guangxi   | 2017 | Manis javanica      | Beijing Institute of Microbiology and Epidemiology | Beijing Institute of Microbiology and Epidemiology | Wu-Chun Cao; Tommy Tsan-Yuk Lam; Na Jia; Ya-Wei Zhang; Jia-Fu Jiang; Bao-Gui Jiang                                                                          |
| EPI_ISL_410540     | hCoV-19/pangolin/Guangxi/P5L/2017                    | Asia / China / Guangxi   | 2017 | Manis javanica      | Beijing Institute of Microbiology and Epidemiology | Beijing Institute of Microbiology and Epidemiology | Wu-Chun Cao; Tommy Tsan-Yuk Lam; Na Jia; Ya-Wei Zhang; Jia-Fu Jiang; Bao-Gui Jiang                                                                          |
| EPI_ISL_410538     | hCoV-19/pangolin/Guangxi/P4L/2017                    | Asia / China / Guangxi   | 2017 | Manis javanica      | Beijing Institute of Microbiology and Epidemiology | Beijing Institute of Microbiology and Epidemiology | Wu-Chun Cao; Tommy Tsan-Yuk Lam; Na Jia; Ya-Wei Zhang; Jia-Fu Jiang; Bao-Gui Jiang                                                                          |
| EPI_ISL_410542     | hCoV-19/pangolin/Guangxi/P2V/2017                    | Asia / China / Guangxi   | 2017 | Manis javanica      | Beijing Institute of Microbiology and Epidemiology | Beijing Institute of Microbiology and Epidemiology | Wu-Chun Cao; Tommy Tsan-Yuk Lam; Na Jia; Ya-Wei Zhang; Jia-Fu Jiang; Bao-Gui Jiang                                                                          |
| EPI_ISL_410721     | hCoV-19/pangolin/Guangdong/1/2019                    | Asia / China / Guangdong | 2019 | Manis javanica      | South China Agricultural University                | South China Agricultural University                | Yongyi Shen, Lihua Xiao, Wu Chen                                                                                                                            |
| <u>NC_019843.3</u> | Middle East respiratory syndrome-related coronavirus |                          |      | <i>Homo sapiens</i> |                                                    |                                                    | van Boheemen,S., de Graaf,M., Lauber,C., Bestebroer,T.M., Raj,V.S.,Zaki,A.M., Osterhaus,A.D., Haagmans,B.L., Gorbalenya,A.E.,Snijder,E.J. and Fouchier,R.A. |
| NP_073551.1        | Human coronavirus 229E                               |                          |      | <i>Homo sapiens</i> |                                                    |                                                    | Thiel,V., Herold,J. and Siddell,S.G.                                                                                                                        |



|                    |                                                       |  |  |                             |  |  |                                                                                                                                                                                                      |
|--------------------|-------------------------------------------------------|--|--|-----------------------------|--|--|------------------------------------------------------------------------------------------------------------------------------------------------------------------------------------------------------|
| YP_00955524<br>1.1 | Human coronavirus OC43                                |  |  | <i>Homo sapiens</i>         |  |  | St-Jean,J.R.,<br>Jacomy,H.,<br>Desforjes,M.,<br>Vabret,A.,<br>Freytmuth,F. And<br>Talbot,P.J.                                                                                                        |
| AVP78042.1         | Bat SARS-like coronavirus                             |  |  | <i>Rhinolophus pusillus</i> |  |  | Hu,D., Zhu,C., Ai,L.,<br>He,T., Wang,Y., Ye,F.,<br>Yang,L.,<br>Ding,C.,Zhu,X., Lv,R.,<br>Zhu,J., Hassan,B.,<br>Feng,Y., Tan,W. and<br>Wang,C.                                                        |
| APO40579.1         | Severe acute respiratory syndrome-related coronavirus |  |  | <i>Rhinolophus sp.</i>      |  |  | Tao,Y. and Tong,S.                                                                                                                                                                                   |
| YP_00385858<br>4.1 | Bat coronavirus BM48-31/BGR/2008                      |  |  | <i>Rhinolophus blasii</i>   |  |  | Drexler,J.F.,<br>Corman,V.M. and<br>Drosten,C.                                                                                                                                                       |
| AHX37558.1         | <i>Rhinolophus affinis</i><br><i>Coronavirus</i>      |  |  | <i>Rhinolophus affinis</i>  |  |  | He,B., Zhang,Y., Xu,L.,<br>Yang,W., Yang,F.,<br>Feng,Y., Xia,L.,<br>Zhou,J., Zhen,W.,<br>Feng,Y., Guo,H.,<br>Zhang,H. and Tu,C.                                                                      |
| AAZ67052.1         | Bat Coronavirus RaTG13                                |  |  | <i>Bat</i>                  |  |  | Li,W., Shi,Z., Yu,M.,<br>Ren,W., Smith,C.,<br>Epstein,J.H.,<br>Wang,H.,Crameri,G.,<br>Hu,Z., Zhang,H.,<br>Zhang,J.,<br>McEachern,J.,<br>Field,H.,Daszak,P.,<br>Eaton,B.T., Zhang,S.<br>and Wang,L.F. |
| ABD75332.1         | Bat SARS CoV Rm1/2004                                 |  |  | <i>Rhinolophus macrotis</i> |  |  | Li,W., Shi,Z., Yu,M.,<br>Ren,W., Smith,C.,<br>Epstein,J.H., Wang,H.,<br>Crameri,G., Hu,Z.,<br>Zhang,H., Zhang,J.,<br>McEachern,J.,<br>Field,H., Daszak,P.,<br>Eaton,B.T., Zhang,S.<br>and Wang,L.F.  |
| YP_00982505<br>1.1 | SARS Coronavirus                                      |  |  | <i>Homo sapiens</i>         |  |  | He,R., Dobie,F.,<br>Ballantine,M.,                                                                                                                                                                   |

|            |                                |  |  |                                  |  |                                                                                                                                                                             |
|------------|--------------------------------|--|--|----------------------------------|--|-----------------------------------------------------------------------------------------------------------------------------------------------------------------------------|
|            |                                |  |  |                                  |  | Leeson,A., Li,Y., Bastien,N., Cutts,T., Andonov,A., Cao,J., Booth,T.F., Plummer,F.A., Tyler,S., Baker,L. and Li,X.                                                          |
| ATO98108.1 | Bat SARS-like Coronavirus      |  |  | <i>Aselliscus stoliczkanu</i>    |  | Hu,B., Zeng,L.P., Yang,X.L., Ge,X.Y., Zhang,W., Li,B., Xie,J.Z., Shen,X.R., Zhang,Y.Z., Wang,N., Luo,D.S., Zheng,X.S., Wang,M.N., Daszak,P., Wang,L.F., Cui,J. and Shi,Z.L. |
| ATO98145.1 | Bat SARS-like Coronavirus      |  |  | <i>Rhinolophus ferrumequinum</i> |  | Hu,B., Zeng,L.P., Yang,X.L., Ge,X.Y., Zhang,W., Li,B., Xie,J.Z., Shen,X.R., Zhang,Y.Z., Wang,N., Luo,D.S., Zheng,X.S., Wang,M.N., Daszak,P., Wang,L.F., Cui,J. and Shi,Z.L. |
| ATO98157.1 | Bat SARS-like Coronavirus      |  |  | <i>Rhinolophus sinicus</i>       |  | Hu,B., Zeng,L.P., Yang,X.L., Ge,X.Y., Zhang,W., Li,B., Xie,J.Z., Shen,X.R., Zhang,Y.Z., Wang,N., Luo,D.S., Zheng,X.S., Wang,M.N., Daszak,P., Wang,L.F., Cui,J. and Shi,Z.L. |
| AAY88866.1 | Bat SARS Coronavirus HKU3-1    |  |  | <i>Bat</i>                       |  | Lau,S.K., Woo,P.C., Li,K.S., Huang,Y., Tsoi,H.W., Wong,B.H., Wong,S.S., Leung,S.Y., Chan,K.H. and Yuen,K.Y.                                                                 |
| AGC74165.1 | Bat Coronavirus Rp/Shaanxi2011 |  |  | <i>Rhinolophus pusillus</i>      |  | Yang,L., Wu,Z., Ren,X., Yang,F., He,G., Zhang,J., Dong,J., Sun,L., Zhu,Y., Du,J., Zhang,S. and Jin,Q.                                                                       |

|            |                               |  |  |                                  |  |  |                                                                                                                                                                                                                                                                                                            |
|------------|-------------------------------|--|--|----------------------------------|--|--|------------------------------------------------------------------------------------------------------------------------------------------------------------------------------------------------------------------------------------------------------------------------------------------------------------|
| AGC74176.1 | Bat Coronavirus Cp/Yunnan2011 |  |  | <i>Chaerephon plicata</i>        |  |  | Yang,L., Wu,Z., Ren,X., Yang,F., He,G., Zhang,J., Dong,J., Sun,L., Zhu,Y., Du,J., Zhang,S. and Jin,Q.                                                                                                                                                                                                      |
| AID16716.1 | Bat SARS-like coronavirus     |  |  | <i>Rhinolophus monoceros</i>     |  |  | Lin,X.D., Wang,W., Hao,Z.Y., Wang,Z.X., Guo,W.P., Guan,X.Q., Wang,M.R., Wang,H.W., Zhou,R.H., Li,M.H., Tang,G.P., Wu,J., Holmes,E.C. and Zhang,Y.Z.                                                                                                                                                        |
| AIA62277.1 | BtRf-BetaCoV/JL2012           |  |  | <i>Rhinolophus ferrumequinum</i> |  |  | Wu,Z., Yang,L., Ren,X., He,G., Zhang,J., Yang,J., Qian,Z., Dong,J., Sun,L., Zhu,Y., Du,J., Yang,F., Zhang,S. and Jin,Q.                                                                                                                                                                                    |
| AIA62310.1 | BtRs-BetaCoV/HuB2013          |  |  | <i>Rhinolophus sinicus</i>       |  |  | Wu,Z., Yang,L., Ren,X., He,G., Zhang,J., Yang,J., Qian,Z., Dong,J., Sun,L., Zhu,Y., Du,J., Yang,F., Zhang,S. and Jin,Q.                                                                                                                                                                                    |
| QHR63300.2 | Bat Coronavirus RaTG13        |  |  | <i>Rhinolophus affinis</i>       |  |  | Zhou,P., Yang,X.-L., Wang,X.-G., Hu,B., Zhang,L., Zhang,W.,Si,H.-R., Zhu,Y., Li,B., Huang,C.-L., Chen,H.-D., Chen,J., Luo,Y., Guo,H., Jiang,R.-D., Liu,M.-Q., Chen,Y., Shen,X.-R., Wang,X., Zheng,X.-S., Zhao,K., Chen,Q.-J., Deng,F., Liu,L.-L., Yan,B., Zhan,F.-X., Wang,Y.-Y., Xiao,G.-F. and Shi,Z.-L. |
| AVP78031.1 | Bat SARS-like Coronavirus     |  |  | <i>Rhinolophus pusillus</i>      |  |  | Hu,D., Zhu,C., Ai,L., He,T., Wang,Y., Ye,F., Yang,L., Ding,C., Zhu,X., Lv,R., Zhu,J.,                                                                                                                                                                                                                      |

**Table S6.** Calculated sequence conservation percentages, across 28 coronavirus sequences, for the RBD and CTD1.

| position | % conserved | sequence (SARS-CoV-2 listed first) |
|----------|-------------|------------------------------------|
| 324      | 7.          | EIIIIIEGVAQTTKQQGQVKQQTQVQDQ       |
| 325      | 43.         | SSSSSSSSSDSEEEEEDEDEEEEEDESS       |
| 326      | 36.         | IIIIIIIVIVIVVVVVVVVVVVVVIV         |
| 327      | 79.         | VVVVVVVVYVVVVIVVVVVIVIIAVVV        |
| 328      | 93.         | RRRRRRRESRRRRRRRRRRRRRRRRRR        |
| 329      | 89.         | FFFFFFFFQLRFFFFFFFFFFFFFFFFFFFF    |
| 330      | 93.         | PPPPPPAPKPPPPPPPPPPPPPPPPPP        |
| 331      | 89.         | NNNNNNNE-PNNNNNNNNNNNNNNNNNN       |
| 332      | 89.         | IIIIIIIG-LIIIIIIIIIIIIIIIIIIII     |
| 333      | 89.         | TTTTTTTV-PTTTTTTTTTTTTTTTTTTT      |
| 334      | 89.         | NNNNNNNE-NNNQNNNNNNNNNNNNNNNN      |
| 335      | 50.         | LLLLLLL---VLLLRRLRLRRRRVRLV        |
| 336      | 96.         | CCCCCCCC-CCCCCCCCCCCCCCCCCCC       |
| 337      | 89.         | PPPPPPPD-NPPPPPPPPPPPPPPPPPP       |
| 338      | 93.         | FFFFFFFF-IFFFFFFFFFFFFFFFFFFFFF    |
| 339      | 43.         | GGGGGGGS-EHGNGDDGDDGDDDDDDGH       |
| 340      | 43.         | EEEEEEEP-AKQEEKKEKAEKKRKKREK       |
| 341      | 93.         | VVVVVVVLVVVVVVVVVVVVVVVVVVVV       |
| 342      | 89.         | FFFFFFFFLYLFFFFFFFFFFFFFFFFFFFF    |
| 343      | 93.         | NNNNNNNSHNNNNNNNNNNNNNNNNNN        |
| 344      | 82.         | AAAAAAGKDAAIAAAAAAAAAAAVAAAA       |
| 345      | 61.         | TSSSSSTHKTSTTTSTTTTTTSTTSTT        |
| 346      | 46.         | RKKKKKT-TSRNSTRKRRTRRRRRTR         |
| 347      | 93.         | FFFFFFFFPFVFFFFFFFFFFFFFFFFFFFF    |
| 348      | 29.         | AAAAAAPIPPPPPPPPPPPPPPPPPAP        |
| 349      | 79.         | SSSSSSQVSSSSSNSSSSNSNSSSSS         |
| 350      | 93.         | VVVVVVVLVPPVVVVVVVVVVVVVVVVV       |
| 351      | 96.         | YYYYYYYYLYYYYYYYYYYYYYYYYYY        |
| 352      | 89.         | AAAAAAN-NAAAAAAAAAAAAAAAAAAA       |
| 353      | 93.         | WWWWWWWF-WWWWWWWWWWWWWWWWWW        |
| 354      | 29.         | NNNNNNNK-EEEEEEEEEEEEEEEEENE       |
| 355      | 96.         | RRRRRRRR-RRRRRRRRRRRRRRRRRR        |
| 356      | 43.         | KKKKKKKL-KTLMKTTKTVKTTTTTKT        |
| 357      | 43.         | RRRRRRRV-TKRRRKKKKRKKKKKKRK        |
| 358      | 89.         | IIIIIIIF-FIIIIIIIIIIIIIIIIIIII     |

|     |      |                               |
|-----|------|-------------------------------|
| 359 | 89.  | SSSSSSST-SSSTSSSSSSSSSSSSSSSS |
| 360 | 54.  | NNNNNNNN-NDDNDDNDNDDDDDDND    |
| 361 | 96.  | CCCCCCCC-CCCCCCCCCCCCCCCCCCC  |
| 362 | 82.  | VVVVVVVN-NIVVVVVVVVVVVVVVVI   |
| 363 | 89.  | AAAAAAAYVFAAAAAAAAAAAAAAAAAA  |
| 364 | 93.  | DDDDDDNDNDDDDDDDDDDDDDDDD     |
| 365 | 89.  | YYYYYYYLFMYYYYYYYYYYYYYYYYY   |
| 366 | 46.  | SSSSSSSTKSTASSTTSTTTSTTTTTST  |
| 367 | 86.  | VVVVVVVKPSVVVVVVVAVVVVVVVV    |
| 368 | 82.  | LLLLLLLLQLFLLLLLLLFLLLLLFLLF  |
| 369 | 89.  | YYYYYYYLSMYYYYYYYYYYYYYYYYY   |
| 370 | 89.  | NNNNNNNSGSNNNNNNNNNNNNNNNN    |
| 371 | 89.  | SSSSSSSLGFSSSSSSSSSSSSSSSS    |
| 372 | 7.   | ATTTTTTFGITSATTTTTTTTTTTTTTT  |
| 373 | 89.  | SSSSSSSS-QSSSSSSFSSSSSSSSSS   |
| 374 | 89.  | FFFFFFFV-AFFFFFFFVFVFVFVFVF   |
| 375 | 89.  | SSSSSSSN-DSSSSSSSSSSSSSSSS    |
| 376 | 89.  | TTTTTTTD-STTTTTTTTTTTTTTTTT   |
| 377 | 96.  | FFFFFFF-FFFFFFFFVFVFVFVFVF    |
| 378 | 86.  | KKKKKKTKTKKQKKKKKKKKKKKKNKK   |
| 379 | 100. | CCCCCCCCCCCCCCCCCCCCCCCCCCC   |
| 380 | 89.  | YYYYYYYSENYYYYYYYYYYYYYYYYY   |
| 381 | 89.  | GGGGGGQNGGGGGGGGGGGGGGGGG     |
| 382 | 89.  | VVVVVVICIVVVVVVVVVVVVVVVVV    |
| 383 | 93.  | SSSSSSSYDSSSSSSSSSSSSSSSS     |
| 384 | 86.  | PPPPPPPPAPPAPPAPPAPPAPPAPP    |
| 385 | 43.  | TTTTTTTAAASTTISSTSSTSSSSSTS   |
| 386 | 93.  | KKKKKKAGKKKKKKKKKKKKKKKKKK    |
| 387 | 89.  | LLLLLLLI-ILLLLLLLLLLLLLLLLL   |
| 388 | 46.  | NNNNNNNAVYINNNIINIINIIIIINI   |
| 389 | 89.  | DDDDDDSDNGDDDDDDDDDDDDDDDD    |
| 390 | 89.  | LLLLLLLNIMLLLLLLLLLLLLLLLL    |
| 391 | 96.  | CCCCCCCCTCCCCCCCCCCCCCCCC     |
| 392 | 93.  | FFFFFFFYLFVFVFVFVFVFVFVFVF    |
| 393 | 71.  | TTTTTTTSASTSSSTTSTTTSTTTTT    |
| 394 | 43.  | NNNNNNNSNSSNSNSSNSNSSSSNS     |
| 395 | 89.  | VVVVVVVL-IVVVVVVVVVVVVVVVV    |
| 396 | 89.  | YYYYYYYIFTYYYYYYYYYYYYYYYY    |
| 397 | 89.  | AAAAAALNIAAAAAAAAAAAAAAAAAA   |
| 398 | 96.  | DDDDDDDEDDDDDDDDDDDDDDDD      |
| 399 | 39.  | SSSSSSSYTKTYSTTSTTTSTTTTTST   |
| 400 | 96.  | FFFFFFF-FFFFFFFFVFVFVFVFVF    |

|     |     |                                |
|-----|-----|--------------------------------|
| 401 | 46. | VVVVVVVS-ALVVVLLVLLVLLLLLLVL   |
| 402 | 54. | IVVVVVVY-IIVVVIIVIIIVIIIIIII   |
| 403 | 50. | RKKKKKRPKPRKKKRRKRRKRRRRRTR    |
| 404 | 50. | GGGGGGGLGNFGGGSSGSFGSSFSFSGF   |
| 405 | 46. | DDDDDDSPGSDDSDSDSSSSSSSDS      |
| 406 | 71. | EEEEEEMLREDDDEEDEEEEEEEEE      |
| 407 | 89. | VVVVVVKCKVVVVVVVVVVVVVVVVV     |
| 408 | 89. | RRRRRRSVVRRRRRRRRRRRRRRRRR     |
| 409 | 89. | QQQQQQQDDDDQQQQQQQQQQQQQQQ     |
| 410 | 50. | IIIIIIILTLVIIIVVIVVIVVIVVIV    |
| 411 | 89. | AAAAAAASSQAAAAAAAAAAAAAAAAA    |
| 412 | 89. | PPPPPPVHLP PPPPPPPPPPPPPPPP    |
| 413 | 86. | GGGGGGSGFGGAAGGGGGGGGGGGGG     |
| 414 | 57. | QQQQQQQSTNQQQQEEQEEQEEEEEQEQ   |
| 415 | 93. | TTTTTTTATLTTTTTTTTTTTTTTTTT    |
| 416 | 96. | GGGGGGGKGGGGGGGGGGGGGGGGGG     |
| 417 | 7.  | KVVVVVRPYYVVVVVVVVVVVVVVVKV    |
| 418 | 93. | IIIIIIIVLIIIIIIIIIIIIIIIIII    |
| 419 | 93. | AAAAAASAQAAAAAAAAAAAAAAAAA     |
| 420 | 89. | DDDDDDQVSDDDDDDDDDDDDDDDDD     |
| 421 | 93. | YYYYYYYFYFYYYYYYYYYYYYYYYYY    |
| 422 | 96. | NNNNNNNN-NNNNNNNNNNNNNNNNN     |
| 423 | 96. | YYYYYYYY-YYYYYYYYYYYYYYYYYY    |
| 424 | 93. | KKKKKKKK-RKKKKKKKKKKKKKKKKK    |
| 425 | 89. | LLLLLLLQ-ILLLLLLLLLLLLLLLLLL   |
| 426 | 89. | PPPPPPS-DPPPPPPPPPPPPPPPPP     |
| 427 | 89. | DDDDDDDF-TDDDDDDDDDDDDDDDD     |
| 428 | 86. | DDDDDDDS-TDDDDDDDDDDDEDDDD     |
| 429 | 89. | FFFFFFFFN-AFFFFFFFFFFFFFFFFFFF |
| 430 | 79. | TTTTTTTP-TTTMTTMTTLTTTTITTT    |
| 431 | 89. | GGGGGGTASGGGGGGGGGGGGGGGGG     |
| 432 | 96. | CCCCCCCNCNNNNNNNNNNNNNNNN      |
| 433 | 93. | VVVVVVLVQVVVVVVVVVVVVVVVVV     |
| 434 | 79. | IIIIIIIGLILILILILILIIIIIIII    |
| 435 | 89. | AAAAAALRYAAAAAAAAAAAAAAAAA     |
| 436 | 93. | WWWWWWWAWYWWWWWWWWWWWWWWW      |
| 437 | 93. | NNNNNNN--NNNNNNNNNNNNNNNN      |
| 438 | 29. | SSSSSSV--TTTTTTTTTTTTTTTTST    |
| 439 | 18. | NVVVVVNPAPANRAARAANAAAAAKA     |
| 440 | 21. | NKKKKKNHSAKSSNKQKQKSKNNKKKHK   |
| 441 | 11. | LQQQQQLNIAQVLIQQIQQKHQQQQIQ    |
| 442 | 89. | DDDDDDLNNDDDDDDDDDDDDDDDD      |



|     |     |                               |
|-----|-----|-------------------------------|
| 443 | 18. | SAAAAASTTVTSSAQQAKVSTQRIVTAV  |
| 444 | 14. | KLLLLLLKTGSGK-TGGTGGSGGGGGGK  |
| 445 | 11. | VTTTTTVI-V-S-S--S--T-----E-   |
| 446 | 29. | GGGGGGGT-S---S--T--S-----G-   |
| 447 | 36. | GGDGGGG--S---G--G--G-----G-   |
| 448 | 43. | NNNNNNNKNT-GSN--N--N-----N-   |
| 449 | 32. | YYYYYYYPCW-NNF--Y--Y-----F-   |
| 450 | 39. | N-GGGGNKPNHNENQQNQSNQONSINN   |
| 451 | 82. | Y-YYYYYFKYFFYYYYYYYYYYYYYYY   |
| 452 | 32. | LLLLLLLSSRFYFKYKYFLYYYYFYLF   |
| 453 | 93. | YYYYYYYYFFYYYYYYYYYYYYYYYYYY  |
| 454 | 89. | RRRRRRRI-GRRRRRRRRRRRRRRRRR   |
| 455 | 32. | LLLLLLLN-FSLRSSYSSWSSSSSSLS   |
| 456 | 36. | FFFFFFFK-IHFFLHYLSHVSSHSHHFH  |
| 457 | 89. | RRRRRRRC-ERRRRRRRRRRRRRRRRR   |
| 458 | 57. | KKKKKKKS-DSHHKHKSRKKKSKKS     |
| 459 | 39. | SSSSSSRGSTGGGTEGTSSTETTSTAT   |
| 460 | 11. | NKKKKKNLKVKKKKKKKKKKKKKKKNK   |
| 461 | 86. | LLLLLLLLVFLIILLLLLLLLLLLLLLLL |
| 462 | 82. | KKKKKKK--KKKKRKKRKNKKKKKKKK   |
| 463 | 89. | PPPPPPDNNPPPPPPPPPPPPPPPP     |
| 464 | 82. | FFFFFFFD-FYFFFFFFFFYFFFFFFF   |
| 465 | 86. | EEEEEEERVHEEGEEEEEEEEEEEEEE   |
| 466 | 89. | RRRRRRRTKDRRRRRRRRRRRRRRRR    |
| 467 | 89. | DDDDDD--VDDDDDDDDDDDDDDDD     |
| 468 | 39. | IIIIIIIVFYLIILILLILLILLILLIL  |
| 469 | 89. | SSSSSSPGASSSSSSSSSSSSSSSS     |
| 470 | 29. | TTTTTTTQSQSNNSNSNSNSSSSSST    |
| 471 | 32. | EEEEEEELVHDVVVDDVDDDDDEDED    |
| 472 | 32. | IIIIIIIVCELLPEEPEEIDEEDEDIE   |
| 473 | 36. | YYYYYYNFF-YFF--F--YG--G-GY-   |
| 474 | 29. | QQQQQQASK-NNS--S--S-----Q-    |
| 475 | 32. | AAAAAANLA-SPP--P--P-----A-    |
| 476 | 32. | GGGGGGQKP-ASD--D--G-----G-    |
| 477 | 29. | SSSSSSYIK-GGG--G--G-----S-    |
| 478 | 25. | TTTTTTT-N-GGK--K--Q-----K-    |
| 479 | 39. | PPPPPPP-F-TTP--P--S-----P-    |
| 480 | 54. | CCCCCCC-CNCCC--C--C-----CN    |
| 481 | 29. | NNNNNNV-P-SS-----N-           |
| 482 | 36. | GGGGGGGS-CGS-T--T--S-----GG   |
| 483 | 14. | VQQQQQV---VIAP--P--A-----QV   |
| 484 | 11. | EVVVVVEIPKRSEP--P--I-----TR   |

|     |     |                                |
|-----|-----|--------------------------------|
| 485 | 39. | GGGGGGVGL-QGA--A--G-----G-     |
| 486 | 11. | FLLLLLFPGN-LLF--L--P-----L-    |
| 487 | 79. | NNNNNNNSCG-GNNNNNNNNNNNNNNNN-  |
| 488 | 46. | CCCCCCTA--CCCGCGGCGGGGGGC-     |
| 489 | 46. | YYYYYYYVM--YYVYVYVYVYVYVYVY-   |
| 490 | 7.  | FYYYYYFWP--EKWRYWRRNYRYLYY-    |
| 491 | 46. | PPPPPPPEISTPPPTTPTTPTTTTTTPT   |
| 492 | 89. | LLLLLLLDVCLLLLLLLLLLLLLLLLLLL  |
| 493 | 7.  | QEEEEEQGAVSKANSNSSRSSSSSSSYS   |
| 494 | 14. | SRRRRSDNGTSSDTTDTTPTTTTTTRT    |
| 495 | 93. | YYYYYYYWSYYYYYYYYYYYYYYYYYY    |
| 496 | 50. | GGGGGGQAGDGGGDDGDGDDDDDDGD     |
| 497 | 89. | FFFFFFFFWYFFFFFFFFFFFFFFFFFFFF |
| 498 | 4.  | QHHHHHLSGNTTYYYYYNFNYNNNYN     |
| 499 | 71. | PPPPPPV-KPPQTPPTPPTPPPPQPPP    |
| 500 | 46. | TTTTTTTA-NNTSTSSTTNTNSSNNTN    |
| 501 | 14. | NTTTTTNS-NVVSNVITVVAVVVVVVDV   |
| 502 | 54. | GGGGGGG-GPGGGPPGPPPPPPPGP      |
| 503 | 54. | VVVVVVS-ILVIIVVIILVLLVLLVVL    |
| 504 | 32. | GNNNNNGTKGEGGAEGEDGADEAEAGE    |
| 505 | 82. | YYYYYYYVYTYFYYYYYYHYYYYYHY     |
| 506 | 89. | QQQQQQAYCQQQQQQQQQQQQQQQQQ     |
| 507 | 50. | PPPPPPMTPAPPPAAPAAPAAAAAPA     |
| 508 | 29. | YFFFFYTIATYYYYTYTTYTTTTTYT     |
| 509 | 89. | RRRRRRREGRRRRRRRRRRRRRRRRR     |
| 510 | 89. | VVVVVVQSTVVVVVVVVVVVVVVVVVV    |
| 511 | 89. | VVVVVVLLNVVVVVVVVVVVVVVVVVV    |
| 512 | 89. | VVVVVVQYYVVVVVVVVVVVVVVVVVV    |
| 513 | 93. | LLLLLLMLLLLLLLLLLLLLLLLLLLL    |
| 514 | 93. | SSSSSSGSTSSSSSSSSSSSSSSSSSS    |
| 515 | 86. | FFFFF-F--PFFFFFFFFFFFFFFFFFFFF |
| 516 | 89. | EEEEEE--QEEEEEEEEEEEEEEEEEE    |
| 517 | 89. | LLLLLLL--ALLLLLLLLLLLLLLLLLLL  |
| 518 | 89. | LLLLLLL--FLLLLLLLLLLLLLLLLLLL  |
| 519 | 4.  | HNNNNNN--LNNNNNNNNNNNNNNNNN    |
| 520 | 71. | AGGGGA--GAAAAAAAAAAAAAAAAAAA   |
| 521 | 89. | PPPPPP--WPPPPPPPPPPPPPPPPPP    |
| 522 | 89. | AAAAAA--SAAAAAAAAAAAAAAAAAAA   |
| 523 | 89. | TTTTTT--DTTTTTTTTTTTTTTTTTTT   |
| 524 | 89. | VVVVVV--SVVVVVVVVVVVVVVVVVV    |
| 525 | 93. | CCCCCC--CCCCCCCCCCCCCCCCCC     |
| 526 | 93. | GGGGGGDGLGGGGGGGGGGGGGGGGG     |

|     |      |                                 |
|-----|------|---------------------------------|
| 527 | 89.  | PPPPPPPTVQPPPPPPPPPPPPPPPPPP    |
| 528 | 96.  | KKKKKKKKSKKKKKKKKKKKKKKKKK      |
| 529 | 11.  | KLLLLLQISALKQLLLLLLLLLLLLLLKL   |
| 530 | 89.  | SSSSSSSAFNSSSSSSSSSSSSSSSSSS    |
| 531 | 93.  | TTTTTTTSMTTTTTTTTTTTTTTTTTT     |
| 532 | 14.  | NTTTTTNQNDQEEDQQDGDQDETSQPENQ   |
| 533 | 89.  | LLLLLLL-VLLLLLLLLLLLLLLLLLLLL   |
| 534 | 75.  | VVVVVVV-TIVVVIVVIVVIVVIVVVVV    |
| 535 | 86.  | KKKKKKLLKLLKKTKKKKKKKKKKKKK     |
| 536 | 71.  | NDDDDDNGDGNNNNNNNNNNNNNNNN      |
| 537 | 39.  | KKKKKKKNKVQKKQQQQQQQQQQQKQ      |
| 538 | 100. | CCCCCCCCCCCCCCCCCCCCCCCCCCC     |
| 539 | 96.  | VVVVVVVTVVVVVVVVVVVVVVVVVVV     |
| 540 | 93.  | NNNNNNNEKNNNNNNNNNNNNNNNNNN     |
| 541 | 89.  | FFFFFFFFYYFXXXXXXXXXXXXXXXXXX   |
| 542 | 93.  | NNNNNNNSNDNNNNNNNNNNNNNNNNNN    |
| 543 | 89.  | FFFFFFFFLILFFFFFFFFFFFFFFFFFFFF |
| 544 | 89.  | NNNNNNNYYYNNNNNNNNNNNNNNNNNN    |
| 545 | 96.  | GGGGGGGDGGGGGGGGGGGGGGGGGG      |
| 546 | 89.  | LLLLLLLVIIVLLLLLLLLLLLLLLLLLLL  |
| 547 | 46.  | TTTTTTTSSLKTTTKRKTKKKKKKTK      |
| 548 | 100. | GGGGGGGGGGGGGGGGGGGGGGGGGG      |
| 549 | 89.  | TTTTTTTRVQTTTTTTTTTTTTTTTTTT    |
| 550 | 100. | GGGGGGGGGGGGGGGGGGGGGGGGGG      |
| 551 | 96.  | VVVVVVVVIVVVVVVVVVVVVVVVVVVV    |
| 552 | 89.  | LLLLLLLFIFLLLLLLLLLLLLLLLLLLL   |
| 553 | 89.  | TTTTTTTQRVTTTTTTTTTTTTTTTTTT    |
| 554 | 18.  | ETTTTTTENVEDSNPETPDDSSADSDKED   |
| 555 | 93.  | SSSSSSSCSVSSSSSSSSSSSSSSSSSS    |
| 556 | 14.  | NKKKKKSTNNSTLSSSSSSSSSSSSNS     |
| 557 | 89.  | KKKKKKKAADAKKKKKKKKKKKKKKKK     |
| 558 | 25.  | KQQQQQKVTVTRKKRRRRRRRRRKKRTRKR  |
| 559 | 93.  | FFFFFFFFGFYFFFFFFFFFFFFFFFFFFFF |
| 560 | 32.  | LLLLLLLVLYQQQQQQQQQQQQQQQQLO    |
| 561 | 46.  | PPPPPPRNNSPPPSSPSSPSSSSSSSPS    |
| 562 | 89.  | FFFFFFFF--SFFFFFFFFFFFFFFFFFFFF |
| 563 | 96.  | QQQQQQQIQQQQQQQQQQQQQQQQQQQ     |
| 564 | 89.  | QQQQQQQRTNQQQQQQQQQQQQQQQQQ     |
| 565 | 93.  | FFFFFFFFFYLFFFFFFFFFFFFFFFFFFFF |
| 566 | 89.  | GGGGGGVTLGGGGGGGGGGGGGGGGGG     |
| 567 | 82.  | RRRRRRYSYKRRRRRRRRRRRRRRRRRK    |
| 568 | 96.  | DDDDDDDTDDDDDDDDDDDDDDDDDD      |

|     |      |                              |
|-----|------|------------------------------|
| 569 | 29.  | IIIIIIIASSAVVFTTVTTVTAATATIA |
| 570 | 11.  | ASSSSSAYGNSSSSSSSSSSSSSSSSAS |
| 571 | 89.  | DDDDDDQ--DDDDDDDDDDDDDDDDDD  |
| 572 | 29.  | TTTTTTLLNFFFFFFFFFFFFFFFFFTF |
| 573 | 82.  | TTTTTTTVLLITTTTTTTTTTTTTTTTI |
| 574 | 89.  | DDDDDD--YDDDDDDDDDDDDDDDDDD  |
| 575 | 29.  | AAAAAAGGGSSSSSSSSSSSSSSSSAS  |
| 576 | 89.  | VVVVVVYFFVVVVVVVVVVVVVVVVV   |
| 577 | 93.  | RRRRRRYKRRRRRRRRRRRRRRRRR    |
| 578 | 96.  | DDDDDDSDDDDDDDDDDDDDDDDDDD   |
| 579 | 89.  | PPPPPPDVYPPPPPPPPPPPPPPPPP   |
| 580 | 71.  | QQQQQQQDTIQKKKQKQKQKQQQQQQ   |
| 581 | 93.  | TTTTTTNKTTTTTTTTTTTTTTTTTTT  |
| 582 | 79.  | LLLLLLL-GNLFLLLLSLLSLLLLLLLL |
| 583 | 75.  | EEEEEEE-TREEEEEEEQDEEEQEQEEE |
| 584 | 86.  | IIIIIIYITIIIVIIIVIIIIIIIIII  |
| 585 | 89.  | LLLLLLLYFLLLLLLLLLLLLLLLLLL  |
| 586 | 89.  | DDDDDDDCSMDDDDDDDDDDDDDDDD   |
| 587 | 96.  | IIIIIIILIIIIIIIIIIIIIIIIIIII |
| 588 | 46.  | TTTTTTTRTRTSASSSSTTSSSSSSTT  |
| 589 | 93.  | PPPPPPAPSPPPPPPPPPPPPPPPPPP  |
| 590 | 100. | CCCCCCCCCCCCCCCCCCCCCCCCCCC  |
| 591 | 86.  | SSSSSSVNYSSSSSSASSSSSSSSSS   |

---

## REFERENCES

1. Le Guilloux, V.; Schmidtke, P.; Tuffery, P., Fpocket: An open source platform for ligand pocket detection. *BMC Bioinformatics* **2009**, *10* (1), 168.
2. Yuan, M.; Wu, N. C.; Zhu, X.; Lee, C.-C. D.; So, R. T. Y.; Lv, H.; Mok, C. K. P.; Wilson, I. A., A highly conserved cryptic epitope in the receptor binding domains of SARS-CoV-2 and SARS-CoV. *Science* **2020**, *368* (6491), 630-633.
3. Casalino, L.; Gaieb, Z.; Goldsmith, J. A.; Hjorth, C. K.; Dommer, A. C.; Harbison, A. M.; Fogarty, C. A.; Barros, E. P.; Taylor, B. C.; McLellan, J. S.; Fadda, E.; Amaro, R. E., Beyond Shielding: The Roles of Glycans in the SARS-CoV-2 Spike Protein. *ACS Central Science* **2020**, *6* (10), 1722-1734.
4. Elbe, S.; Buckland-Merrett, G., Data, disease and diplomacy: GISAID's innovative contribution to global health. *Global Challenges* **2017**, *1* (1), 33-46.
